# Supplementary material for: Self-promoted ammonia selectivity for the electro-reduction of nitrogen on gt-C3N4 supported single metal catalysts: the machine learning model and physical insights
Source: Royal Society of Chemistry journal article supplement (doi:10.1039/d3qi01390a), 2023-01-01
Supplement: d3qi01390a1.pdf [file d3qi01390a1.pdf]

# Self-Promoted Ammonia Selectivity for the Electro-Reduction of Nitrogen on *gt*-C<sub>3</sub>N<sub>4</sub> Supported Single Metal Catalysts: The Machine Learning Model and Physical Insights

Lifu Zhang<sup>a,b,†</sup>, Lanlan Chen<sup>b,†</sup>, Wanghui Zhao<sup>b,†</sup>, Zhenpeng Hu<sup>\*a</sup>, Jing Chen<sup>a,c</sup>,  
Wenhua Zhang<sup>\*b</sup>, and Jinlong Yang<sup>b</sup>

<sup>a</sup> School of Physics, Nankai University, Tianjin 300071, China

<sup>b</sup> Hefei National Laboratory for Physical Sciences at the Microscale, CAS Key Laboratory of Materials for Energy Conversion and Synergetic Innovation Centre of Quantum Information & Quantum Physics, University of Science and Technology of China, Hefei, Anhui 230026, China

<sup>c</sup> Collaborative Innovation Center of Extreme Optics, Shanxi University, Taiyuan, Shanxi 030006, China

**Table S1.** The reaction energy ( $\Delta E/eV$ ) of the adsorption of H, N<sub>2</sub> and the protonation of nitrogen on Mo/Re embedded MoS<sub>2</sub>.

| System               | $\Delta E/eV$ |             |              |               |                              |                               |                                |                              |                               |                                |
|----------------------|---------------|-------------|--------------|---------------|------------------------------|-------------------------------|--------------------------------|------------------------------|-------------------------------|--------------------------------|
|                      | *H            | * <u>NN</u> | * <u>NNH</u> | * <u>NN*H</u> | *1N <sub>2</sub> - <u>NN</u> | *1N <sub>2</sub> - <u>NNH</u> | *1N <sub>2</sub> - <u>NN*H</u> | *2N <sub>2</sub> - <u>NN</u> | *2N <sub>2</sub> - <u>NNH</u> | *2N <sub>2</sub> - <u>NN*H</u> |
| Mo/ MoS <sub>2</sub> | -0.36         | -1.09       | 0.25         | -0.30         | -1.20                        | 0.33                          | -0.18                          | -1.25                        | 1.02                          | 1.09                           |
| Re/ MoS <sub>2</sub> | -0.68         | -1.55       | 0.15         | -0.60         | -1.33                        | 0.40                          | -0.68                          | -0.67                        | 1.25                          | 1.65                           |

**Table S2.** The reaction free energy ( $\Delta G/eV$ ) of the adsorption of H, N<sub>2</sub> and the protonation of nitrogen on different element embedded *gt*-C<sub>3</sub>N<sub>4</sub>.

| Element | $\Delta G/eV$ |             |                   |              |              |               |                              |                               |                                |                              |                               |                                |
|---------|---------------|-------------|-------------------|--------------|--------------|---------------|------------------------------|-------------------------------|--------------------------------|------------------------------|-------------------------------|--------------------------------|
|         | *H            | * <u>NN</u> | * <u>NN</u>       | * <u>NNH</u> | * <u>NNH</u> | * <u>NN*H</u> | *1N <sub>2</sub> - <u>NN</u> | *1N <sub>2</sub> - <u>NNH</u> | *1N <sub>2</sub> - <u>NN*H</u> | *2N <sub>2</sub> - <u>NN</u> | *2N <sub>2</sub> - <u>NNH</u> | *2N <sub>2</sub> - <u>NN*H</u> |
| Sc      | -0.80         | -0.48       | -0.53             |              |              |               | -0.19                        |                               |                                | -0.04                        |                               |                                |
| Ti      | -0.63         | -0.73       | -0.75             | 0.93         | 0.53         | 0.01          | -0.51                        | 1.15                          | 0.63                           | -0.29                        | 1.04                          | 0.93                           |
| V       | -0.69         | -0.88       | -0.78             | 0.93         | 0.62         | 0.06          | -0.50                        | 1.13                          | 0.35                           | -0.35                        | 0.83                          | 1.05                           |
| Cr      | -0.32         | -0.92       | -0.40             | 1.04         | 0.63         | 0.19          | -0.12                        | 0.98                          | 0.14                           | -0.70                        | 1.26                          | 1.79                           |
| Mn      | -0.53         | -0.52       | -0.24             | 1.05         | 0.95         | 0.32          | -0.17                        | 1.13                          | 0.08                           | -0.32                        | 1.75                          | 2.52                           |
| Fe      | -0.39         | -0.89       | -0.54             | 1.18         | 1.12         | 0.23          | 0.01                         |                               |                                | 0.54                         |                               |                                |
| Co      | -0.35         | -0.77       | -0.35             | 1.25         | 1.24         | 0.20          | 0.37                         |                               |                                | 0.48                         |                               |                                |
| Ni      | 0.00          | -0.82       | -0.29             | 1.55         | 1.50         | 0.65          | 0.04                         |                               |                                | 0.76                         |                               |                                |
| Cu      | -0.27         | -0.52       | 0.00              | 1.92         | 1.87         | 0.75          | *                            |                               |                                |                              |                               |                                |
| Zn      | -0.35         | 0.41        | 0.45              |              |              |               |                              |                               |                                |                              |                               |                                |
| Y       | -0.61         | -0.20       | -0.32             |              |              |               | -0.21                        |                               |                                | -0.04                        |                               |                                |
| Zr      | -0.82         | -0.77       | -0.87             | 0.69         | 0.32         | -0.37         | -0.60                        | 0.98                          | 0.21                           | -0.37                        | 0.88                          | 0.44                           |
| Nb      | -0.67         | -0.85       | -0.85             | 0.68         | 0.28         | -0.12         | -0.72                        | 0.74                          | 0.34                           | -0.53                        | 0.57                          | 0.41                           |
| Mo      | -0.61         | -1.18       | -1.08             | 0.82         | 0.85         | -0.04         | -1.01                        | 1.08                          | 0.48                           | -0.71                        | 1.04                          | 1.15                           |
| Tc      | -0.71         | -1.23       | -0.69             | 0.97         | 0.67         | -0.39         | -1.01                        | 1.24                          | 0.02                           | -0.58                        | 1.84                          | 2.23                           |
| Ru      | -0.79         | -1.01       | -0.39             | 0.97         | 0.63         | -0.65         | -0.84                        | 1.21                          | -0.43                          | 0.43                         |                               |                                |
| Rh      | -0.52         | -1.00       | -0.35             | 0.90         | 0.51         | -0.52         | -0.49                        |                               |                                |                              |                               |                                |
| Pd      | -0.32         | -1.00       | -0.66             | 1.90         | 1.76         | 0.80          | 0.36                         |                               |                                |                              |                               |                                |
| Ag      | -0.23         | 0.35        | 0.35 <sup>†</sup> |              |              |               |                              |                               |                                |                              |                               |                                |
| Cd      | 0.62          | 0.40        | 0.45              |              |              |               |                              |                               |                                |                              |                               |                                |
| Ta      | -1.17         | -1.08       | -1.30             | 0.56         | 0.07         | -0.59         | -0.94                        | 0.63                          | 0.00                           | -0.76                        | 0.49                          | 0.29                           |
| W       | -1.19         | -1.29       | -1.56             | 0.45         | 0.61         | -0.64         | -1.32                        | 0.81                          | 0.07                           | -1.01                        | 0.87                          | 0.92                           |
| Re      | -1.26         | -1.42       | -1.15             | 0.58         | 0.43         | -0.84         | -1.33                        | 0.91                          | -0.44                          | -0.98                        | 1.58                          | 2.14                           |

\*NN\*H represents the geometry where one nitrogen is adsorbed on the metal, when H is also adsorbed on the metal. \* represent the structure does not exist.

**Table S3.** PDS and  $U_L$  for *gt*-C<sub>3</sub>N<sub>4</sub> supported different element-N<sub>2</sub> complex to catalyse N<sub>2</sub>-fixation.

| Element | $*2N_2$ - <u>NN</u>                                                            |       |
|---------|--------------------------------------------------------------------------------|-------|
|         | PDS                                                                            | $U_L$ |
| V       | $*2N_2$ - <u>NN</u> + (H <sup>+</sup> +e <sup>-</sup> ) → $*2N_2$ - <u>NNH</u> | -0.83 |
| Cr      | $*2N_2$ - <u>NN</u> + (H <sup>+</sup> +e <sup>-</sup> ) → $*2N_2$ - <u>NNH</u> | -1.26 |
| Mo      | $*2N_2$ - <u>NN</u> + (H <sup>+</sup> +e <sup>-</sup> ) → $*2N_2$ - <u>NNH</u> | -1.04 |
| W       | $*2N_2$ - <u>NN</u> + (H <sup>+</sup> +e <sup>-</sup> ) → $*2N_2$ - <u>NNH</u> | -0.87 |

**Table S4.** Net effective charges calculated from Bader Charge analysis of the systems on the H@Sc/*gt*-C<sub>3</sub>N<sub>4</sub>, 1N<sub>2</sub>-H@Rh/*gt*-C<sub>3</sub>N<sub>4</sub>, 2N<sub>2</sub>-H@Ru/*gt*-C<sub>3</sub>N<sub>4</sub>, 3N<sub>2</sub>-H@Zr/*gt*-C<sub>3</sub>N<sub>4</sub> which correspond to low selectivity, and H@V/*gt*-C<sub>3</sub>N<sub>4</sub>, 1N<sub>2</sub>-H@V/*gt*-C<sub>3</sub>N<sub>4</sub>, 2N<sub>2</sub>-H@V/*gt*-C<sub>3</sub>N<sub>4</sub> and 3N<sub>2</sub>-H@V/*gt*-C<sub>3</sub>N<sub>4</sub> which correspond to high selectivity.

|                         | Bader valence                                      |                                                                         |                                                                         |                                                                         | Bader valence                                     |                                                                        |                                                                        |                                                                        |
|-------------------------|----------------------------------------------------|-------------------------------------------------------------------------|-------------------------------------------------------------------------|-------------------------------------------------------------------------|---------------------------------------------------|------------------------------------------------------------------------|------------------------------------------------------------------------|------------------------------------------------------------------------|
|                         | H@Sc/ <i>gt</i> -<br>C <sub>3</sub> N <sub>4</sub> | 1N <sub>2</sub> -<br>H@Rh/ <i>gt</i> -<br>C <sub>3</sub> N <sub>4</sub> | 2N <sub>2</sub> -<br>H@Ru/ <i>gt</i> -<br>C <sub>3</sub> N <sub>4</sub> | 3N <sub>2</sub> -<br>H@Zr/ <i>gt</i> -<br>C <sub>3</sub> N <sub>4</sub> | H@V/ <i>gt</i> -<br>C <sub>3</sub> N <sub>4</sub> | 1N <sub>2</sub> -<br>H@V/ <i>gt</i> -<br>C <sub>3</sub> N <sub>4</sub> | 2N <sub>2</sub> -<br>H@V/ <i>gt</i> -<br>C <sub>3</sub> N <sub>4</sub> | 3N <sub>2</sub> -<br>H@V/ <i>gt</i> -<br>C <sub>3</sub> N <sub>4</sub> |
| metal                   | Sc : +1.87                                         | Rh : +0.50                                                              | Ru : +1.04                                                              | Zr : +2.01                                                              | V : +1.36                                         | V : +1.42                                                              | V : +1.42                                                              | V : +1.45                                                              |
| H on metal              | -0.65                                              | -0.16                                                                   | -0.18                                                                   | -0.41                                                                   | -0.52                                             | -0.47                                                                  | -0.41                                                                  | -0.20                                                                  |
| adsorbed N <sub>2</sub> |                                                    | -0.34/+0.12                                                             | -0.29/+0.09<br>-0.24/+0.04                                              | -0.38/+0.14<br>-0.38/+0.07<br>-0.36/+0.11                               |                                                   | -0.26/-0.01                                                            | -0.25/+0.01<br>-0.39/+0.15                                             | -0.26/+0.03<br>-0.31/+0.05<br>-0.26/+0.03                              |

**Table S5.** Net effective charges calculated from Bader Charge analysis of TM/*gt*-C<sub>3</sub>N<sub>4</sub>.

|                              | Bader valence of metal                           |                                                  |                                                 |                                                  |                                                  |                                                  |                                                  |                                                  |                                                  |                                                  |
|------------------------------|--------------------------------------------------|--------------------------------------------------|-------------------------------------------------|--------------------------------------------------|--------------------------------------------------|--------------------------------------------------|--------------------------------------------------|--------------------------------------------------|--------------------------------------------------|--------------------------------------------------|
|                              | Sc/ <i>gt</i> -<br>C <sub>3</sub> N <sub>4</sub> | Ti/ <i>gt</i> -<br>C <sub>3</sub> N <sub>4</sub> | V/ <i>gt</i> -<br>C <sub>3</sub> N <sub>4</sub> | Cr/ <i>gt</i> -<br>C <sub>3</sub> N <sub>4</sub> | Mn/ <i>gt</i> -<br>C <sub>3</sub> N <sub>4</sub> | Fe/ <i>gt</i> -<br>C <sub>3</sub> N <sub>4</sub> | Co/ <i>gt</i> -<br>C <sub>3</sub> N <sub>4</sub> | Ni/ <i>gt</i> -<br>C <sub>3</sub> N <sub>4</sub> | Cu/ <i>gt</i> -<br>C <sub>3</sub> N <sub>4</sub> | Zn/ <i>gt</i> -<br>C <sub>3</sub> N <sub>4</sub> |
| substrate                    | +1.45                                            | +1.18                                            | +1.03                                           | +0.95                                            | +0.79                                            | +0.90                                            | +0.75                                            | +0.63                                            | +0.65                                            | +0.11                                            |
| * <u>NN</u>                  |                                                  | +1.42                                            | +1.38                                           | +1.15                                            | +1.15                                            | +1.03                                            | +0.86                                            | +0.67                                            | +0.83                                            |                                                  |
| *1N <sub>2</sub> - <u>NN</u> |                                                  | +1.48                                            | +1.41                                           | +1.26                                            | +1.11                                            |                                                  |                                                  |                                                  |                                                  |                                                  |
| *2N <sub>2</sub> - <u>NN</u> |                                                  | +1.51                                            | +1.45                                           | +1.28                                            | +1.21                                            |                                                  |                                                  |                                                  |                                                  |                                                  |

  

|                              | Bader valence of metal                          |                                                  |                                                  |                                                  |                                                  |                                                  |                                                  |                                                  |                                                  |                                                  |
|------------------------------|-------------------------------------------------|--------------------------------------------------|--------------------------------------------------|--------------------------------------------------|--------------------------------------------------|--------------------------------------------------|--------------------------------------------------|--------------------------------------------------|--------------------------------------------------|--------------------------------------------------|
|                              | Y/ <i>gt</i> -<br>C <sub>3</sub> N <sub>4</sub> | Zr/ <i>gt</i> -<br>C <sub>3</sub> N <sub>4</sub> | Nb/ <i>gt</i> -<br>C <sub>3</sub> N <sub>4</sub> | Mo/ <i>gt</i> -<br>C <sub>3</sub> N <sub>4</sub> | Tc/ <i>gt</i> -<br>C <sub>3</sub> N <sub>4</sub> | Ru/ <i>gt</i> -<br>C <sub>3</sub> N <sub>4</sub> | Rh/ <i>gt</i> -<br>C <sub>3</sub> N <sub>4</sub> | Pd/ <i>gt</i> -<br>C <sub>3</sub> N <sub>4</sub> | Ag/ <i>gt</i> -<br>C <sub>3</sub> N <sub>4</sub> | Cd/ <i>gt</i> -<br>C <sub>3</sub> N <sub>4</sub> |
| substrate                    | +1.44                                           | +1.65                                            | +1.35                                            | +1.02                                            | +0.84                                            | +0.67                                            | +0.52                                            | +0.17                                            | +0.20                                            | +0.11                                            |
| * <u>NN</u>                  |                                                 | +1.77                                            | +1.63                                            | +1.22                                            | +1.07                                            | +0.81                                            | +0.47                                            | +0.29                                            |                                                  |                                                  |
| *1N <sub>2</sub> - <u>NN</u> |                                                 | +1.85                                            | +1.72                                            | +1.35                                            | +1.19                                            | +0.97                                            |                                                  |                                                  |                                                  |                                                  |
| *2N <sub>2</sub> - <u>NN</u> |                                                 | +1.92                                            | +1.87                                            | +1.41                                            | +1.28                                            |                                                  |                                                  |                                                  |                                                  |                                                  |

  

|                              | Bader valence of metal                           |                                                 |                                                  |
|------------------------------|--------------------------------------------------|-------------------------------------------------|--------------------------------------------------|
|                              | Ta/ <i>gt</i> -<br>C <sub>3</sub> N <sub>4</sub> | W/ <i>gt</i> -<br>C <sub>3</sub> N <sub>4</sub> | Re/ <i>gt</i> -<br>C <sub>3</sub> N <sub>4</sub> |
| substrate                    | +1.32                                            | +0.97                                           | +0.80                                            |
| * <u>NN</u>                  | +1.61                                            | +1.41                                           | +1.15                                            |
| *1N <sub>2</sub> - <u>NN</u> | +1.78                                            | +1.56                                           | +1.38                                            |
| *2N <sub>2</sub> - <u>NN</u> | +1.84                                            | +1.64                                           | +1.50                                            |

**Table S6.** Net effective charges calculated from Bader Charge analysis of the systems on the 1N<sub>2</sub>@V/*gt*-C<sub>3</sub>N<sub>4</sub>, 2N<sub>2</sub>@V/*gt*-C<sub>3</sub>N<sub>4</sub> and 3N<sub>2</sub>@V/*gt*-C<sub>3</sub>N<sub>4</sub>.

|                         | Bader valence                                                |                                                              |                                                              |
|-------------------------|--------------------------------------------------------------|--------------------------------------------------------------|--------------------------------------------------------------|
|                         | 1N <sub>2</sub> @V/ <i>gt</i> -C <sub>3</sub> N <sub>4</sub> | 2N <sub>2</sub> @V/ <i>gt</i> -C <sub>3</sub> N <sub>4</sub> | 3N <sub>2</sub> @V/ <i>gt</i> -C <sub>3</sub> N <sub>4</sub> |
| adsorbed N <sub>2</sub> | -0.40/+0.01                                                  | -0.40/+0.08<br>0.37/+0.05                                    | -0.29/+0.02<br>0.30/+0.02<br>-0.38/+0.10                     |

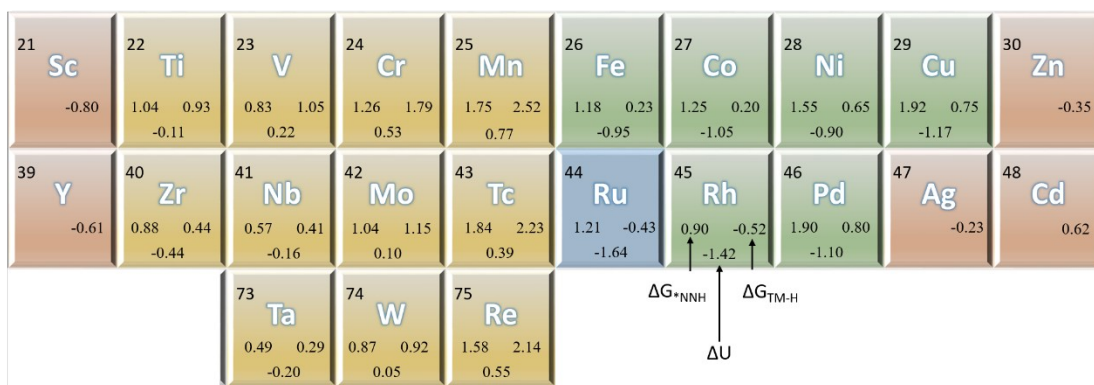

**Figure S1.** Numbers of nitrogen molecules effectively binding on TM/*gt*-C<sub>3</sub>N<sub>4</sub> (orange, green, blue and yellow region represent 0, 1, 2, 3), the reaction Gibbs free energy (eV) of the formation of \*NNH ( $\Delta G^{*NNH}$ ), the adsorption free energy of H on the metal for TM/*gt*-C<sub>3</sub>N<sub>4</sub> ( $\Delta G_{TM-H}$ ), and the potential difference (U) between the formation of \*NNH and TM-H ( $\Delta U = U^{*NNH} - U_{TM-H} = -\Delta G^{*NNH}/e - [-\Delta G_{TM-H}/e]$ ).

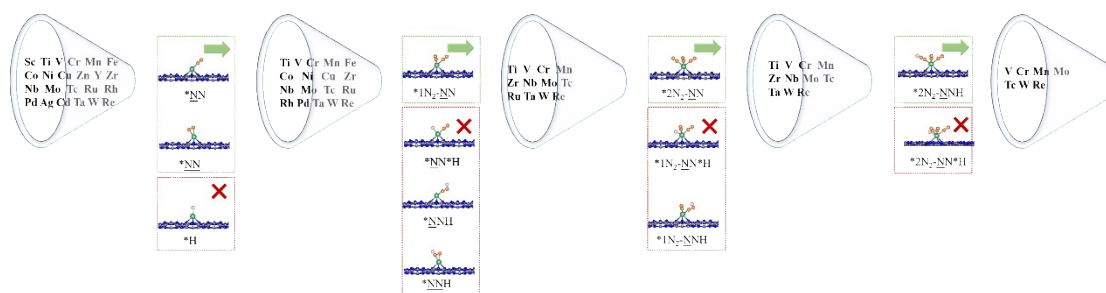

**Figure S2.** Flowchart of the screening procedure of eNRR on TM/*gt*-C<sub>3</sub>N<sub>4</sub>.

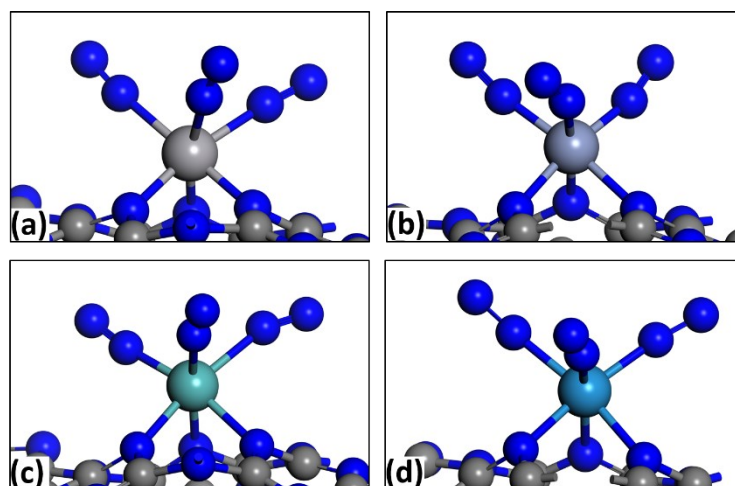

**Figure S3.** Structural snapshots of the (a) 3N<sub>2</sub>@V/*gt*-C<sub>3</sub>N<sub>4</sub>, (b) 3N<sub>2</sub>@Cr/*gt*-C<sub>3</sub>N<sub>4</sub>, (c) 3N<sub>2</sub>@Mo/*gt*-C<sub>3</sub>N<sub>4</sub>, and (d) 3N<sub>2</sub>@W/*gt*-C<sub>3</sub>N<sub>4</sub> for AIMD simulation at 300 K after 5.0 ps.

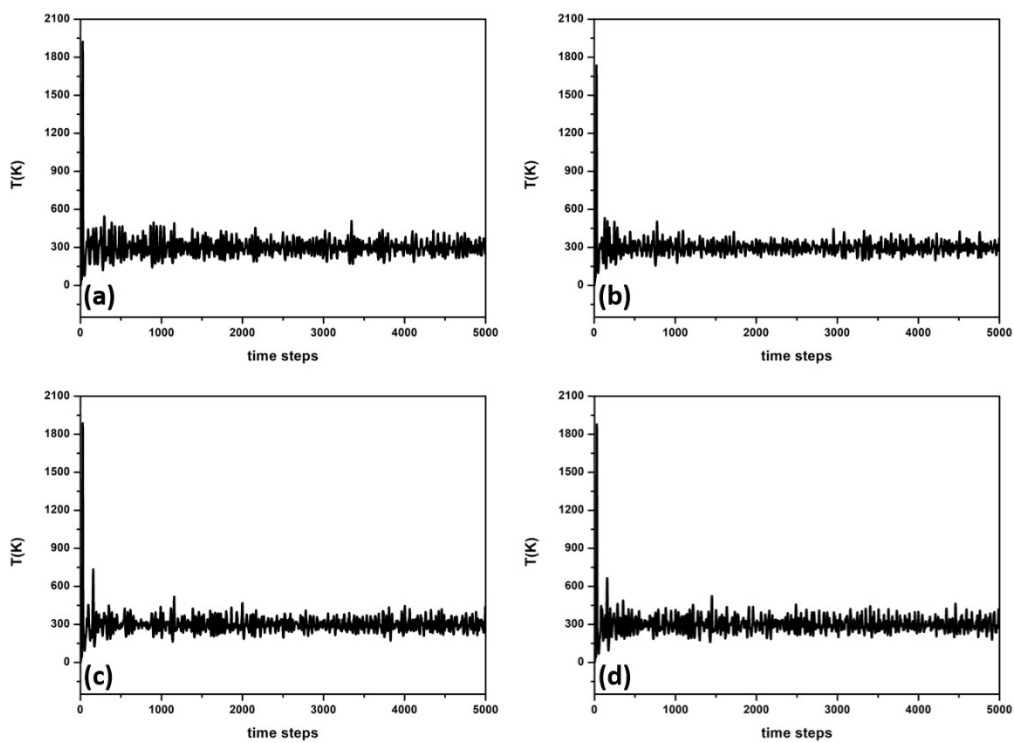

Figure S4. Temperature vs time for (a)  $3N_2@V/gt-C_3N_4$ , (b)  $3N_2@Cr/gt-C_3N_4$ , (c)  $3N_2@Mo/gt-C_3N_4$ , and (d)  $3N_2@W/gt-C_3N_4$  during the MD simulation after 5.0 ps.

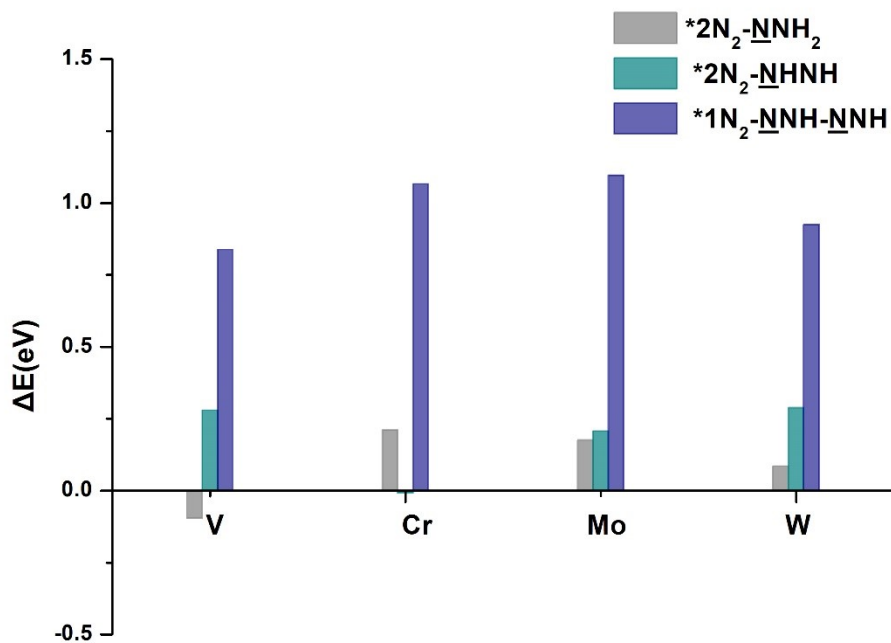

Figure S5. The energy of the second protonation of nitrogen for  $3N_2$  adsorbed on  $TM/gt-C_3N_4$  ( $TM = V, Cr, Nb, Mo, Ta, W$ ).

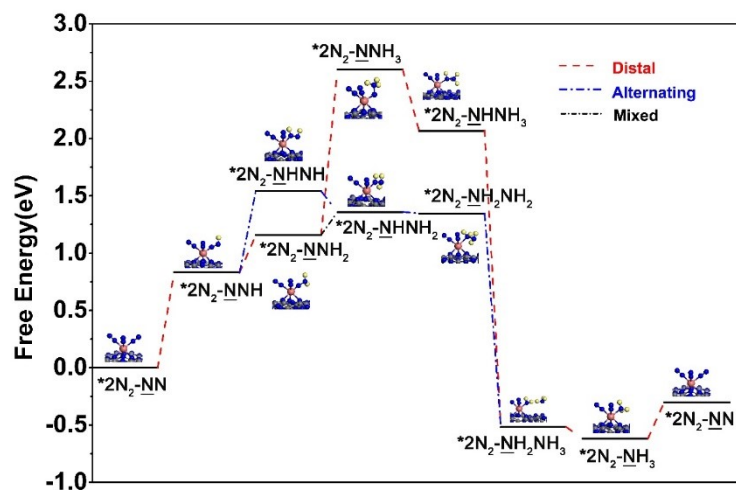

**Figure S6.** Free energy diagram at U = 0 V (vs SHE) for the reaction intermediates by adsorbing three N<sub>2</sub> on the V/gt-C<sub>3</sub>N<sub>4</sub>. The dashed lines indicated the possible reaction pathways.

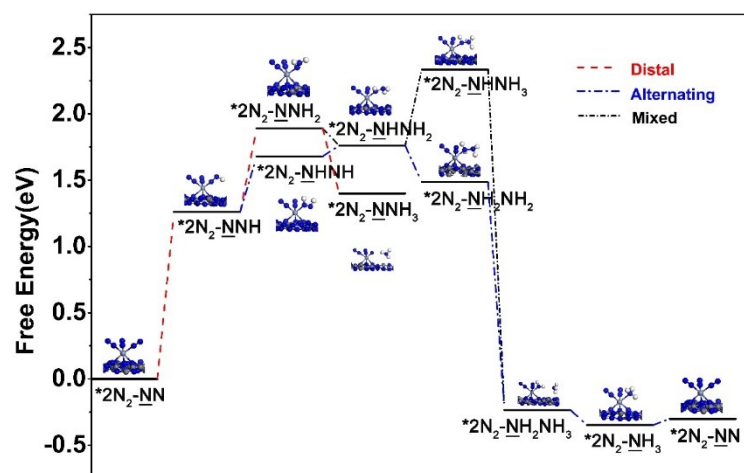

**Figure S7.** Free energy diagram at U = 0 V (vs SHE) for the reaction intermediates by adsorbing three N<sub>2</sub> on the Cr/gt-C<sub>3</sub>N<sub>4</sub>. The dashed lines indicated the possible reaction pathways.

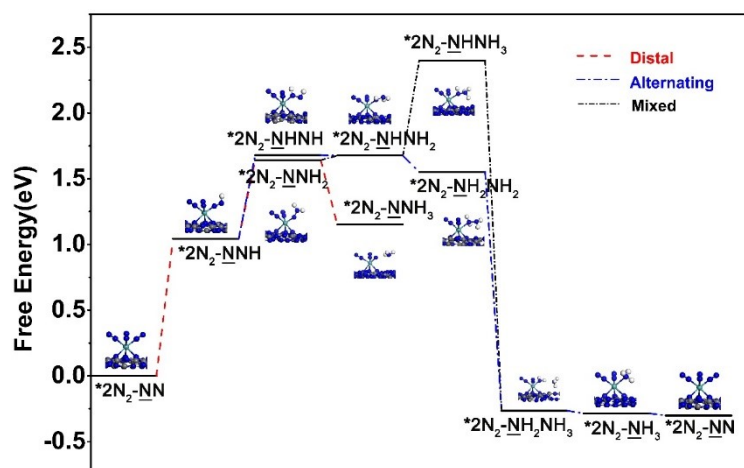

**Figure S8.** Free energy diagram at U = 0 V (vs SHE) for the reaction intermediates by adsorbing three N<sub>2</sub> on the Mo/gt-C<sub>3</sub>N<sub>4</sub>. The dashed lines indicated the possible reaction pathways.

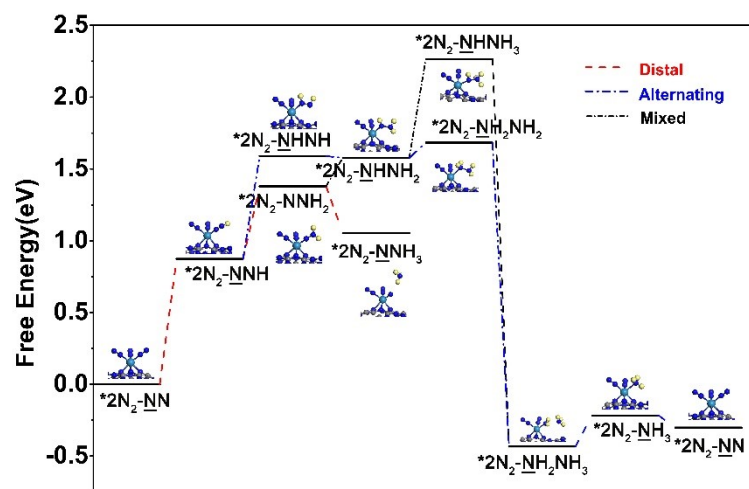

**Figure S9.** Free energy diagram at  $U = 0$  V (vs SHE) for the reaction intermediates by adsorbing three  $N_2$  on the  $W/gt-C_3N_4$ . The dashed lines indicated the possible reaction pathways.

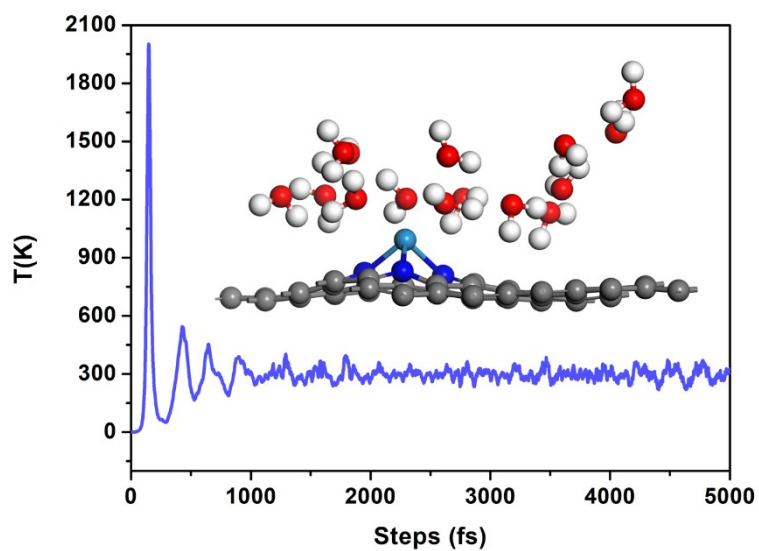

**Figure S10.** Molecular dynamics simulation at  $T = 300$  K with 5 ps.
